# Supplementary material
Source: PubMed Central journal article supplement (PMC8172150)
Supplement: mmc1.pdf [file mmc1.pdf]

# THE LANCET

## **Supplementary appendix**

This appendix formed part of the original submission. We post it as supplied by the authors.

Supplement to: Kosaka M, Hashimoto T, Ozaki A, Tanimoto T, Kami M. Delayed COVID-19 vaccine roll-out in Japan. *Lancet* 2021; published online June 2. [http://dx.doi.org/10.1016/S0140-6736\(21\)01220-4](http://dx.doi.org/10.1016/S0140-6736(21)01220-4).

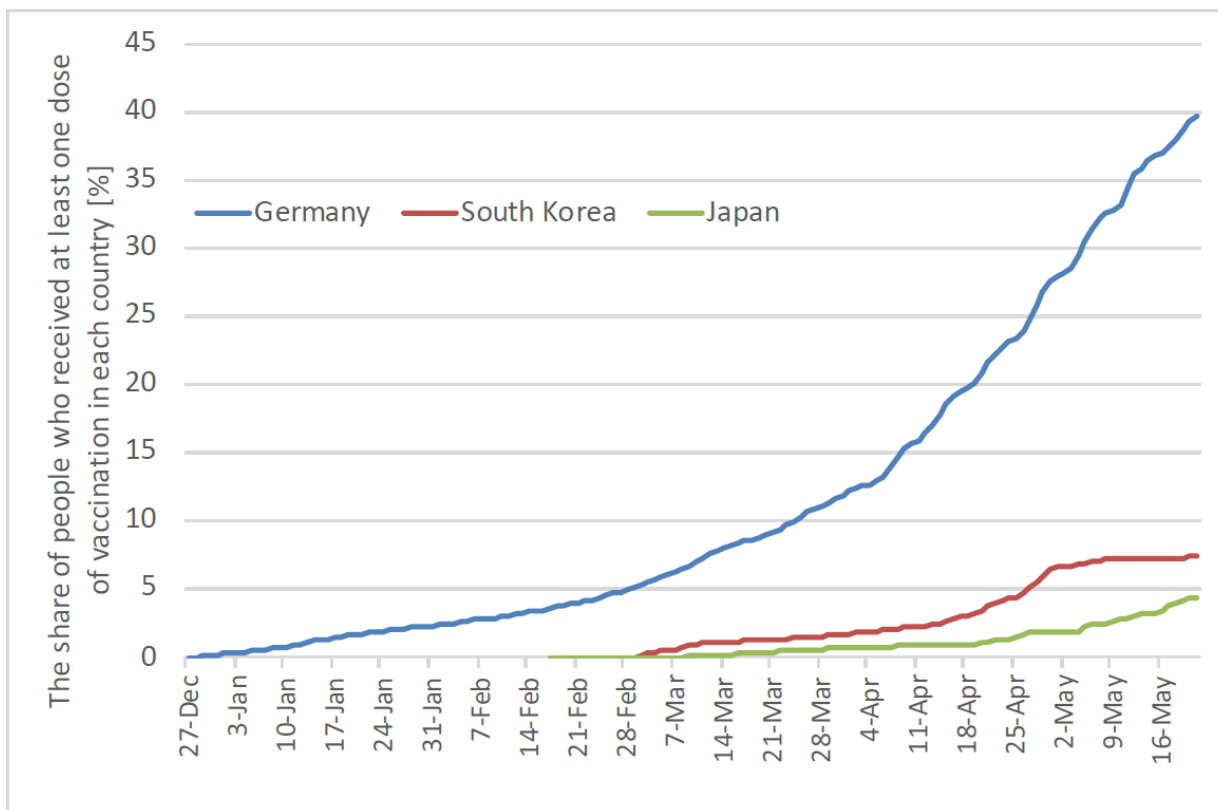

**Figure: Comparison of the share of people who received at least one dose of vaccination in each country as of May, 2021 (Data source: Our data in World).**
